# Supplementary material for: Investigating the relationship between DNA methylation, genetic variation, and suicide attempt in bipolar disorder
Source: bioRxiv or medRxiv preprint supplement (doi:10.1101/2024.04.03.24305263), 2024-04-03
Supplement: Supplementary file [file media-1.pdf]

**Supplemental Table 1. Demographic Information**

|                                            | No history of suicide attempt (N=51) | History of suicide attempt (N=55) | Overall (N=106)   | P-value                       |
|--------------------------------------------|--------------------------------------|-----------------------------------|-------------------|-------------------------------|
| <b>Sex</b>                                 |                                      |                                   |                   | 0.132 <sup>a</sup>            |
| <b>Male</b>                                | 22 (43%)                             | 15 (27%)                          | 37 (35%)          |                               |
| <b>Female</b>                              | 29 (57%)                             | 40 (73%)                          | 69 (65%)          |                               |
| <b>Age (years)</b>                         |                                      |                                   |                   | 0.308 <sup>b</sup>            |
| <b>Mean (SD)</b>                           | 39.4 (13.7)                          | 42.1 (13.6)                       | 40.8 (13.6)       |                               |
| <b>Median [Min, Max]</b>                   | 37.0 [18.0, 66.0]                    | 41.0 [18.0, 68.0]                 | 41.0 [18.0, 68.0] |                               |
| <b>Race</b>                                |                                      |                                   |                   | 0.404 <sup>c</sup>            |
| <b>Am. Indian/Alaskan Native</b>           | 1 (2%)                               | 1 (2%)                            | 2 (2%)            |                               |
| <b>Asian</b>                               | 1 (2%)                               | 0 (0%)                            | 1 (1%)            |                               |
| <b>Black/African American</b>              | 1 (2%)                               | 5 (9%)                            | 6 (6%)            |                               |
| <b>More than one race</b>                  | 1 (2%)                               | 2 (4%)                            | 3 (3%)            |                               |
| <b>Unknown</b>                             | 0 (0%)                               | 0 (0%)                            | 0 (0%)            |                               |
| <b>White</b>                               | 47 (92%)                             | 47 (86%)                          | 94 (89%)          |                               |
| <b>Smoking history</b>                     |                                      |                                   |                   | <b>0.024<sup>c</sup></b>      |
| <b>Current smoker</b>                      | 5 (10%)                              | 14 (26%)                          | 19 (18%)          |                               |
| <b>Missing</b>                             | 0 (0%)                               | 1 (2%)                            | 1 (1%)            |                               |
| <b>Never smoker</b>                        | 28 (55%)                             | 17 (31%)                          | 45 (43%)          |                               |
| <b>Past smoker</b>                         | 18 (35%)                             | 23 (42%)                          | 41 (39%)          |                               |
| <b>Body Mass Index (BMI)</b>               |                                      |                                   |                   | 0.605 <sup>b</sup>            |
| <b>Mean (SD)</b>                           | 30.3 (7.61)                          | 31.0 (7.39)                       | 30.7 (7.47)       |                               |
| <b>Median [Min, Max]</b>                   | 29.2 [18.4, 59.0]                    | 31.0 [18.9, 50.5]                 | 29.9 [18.4, 59.0] |                               |
| <b>Number of lifetime suicide attempts</b> |                                      |                                   |                   | <b>1.831x10<sup>-6b</sup></b> |
| <b>Mean (SD)</b>                           | 0 (0)                                | 3.56 (4.94)                       | 1.85 (3.97)       |                               |
| <b>Median [Min, Max]</b>                   | 0 [0, 0]                             | 2.00 [1.00, 30.0]                 | 1.00 [0, 30.0]    |                               |

Descriptive statistics for the bipolar disorder cohort separated by history of suicide attempt.

<sup>a</sup>Pearson's Chi-squared test with Yates' continuity correction; <sup>b</sup>Welch's Two Sample T-Test;

<sup>c</sup>Fisher's Exact Test. Significant differences are indicated in bold. SD, standard deviation.

**Supplemental Table 2. Correlation between DNA methylation and number of lifetime suicide attempts**

| Gene   | CpG Genomic Location | Statistic | P-value               | False Discovery Rate (FDR) |
|--------|----------------------|-----------|-----------------------|----------------------------|
| MIF    | chr22:23894125       | -3.664    | 2.49x10 <sup>-4</sup> | 0.022                      |
| IMPA2  | chr18:11994457       | -3.136    | 1.71x10 <sup>-3</sup> | 0.075                      |
| INPP1  | chr2:190354545       | -2.806    | 5.02x10 <sup>-3</sup> | 0.147                      |
| IRX2*  | chr5:2468211         | -2.645    | 8.17x10 <sup>-3</sup> | 0.177                      |
| NOS3   | chr7:150998982       | -2.573    | 0.010                 | 0.177                      |
| CRHR1  | chr17:45805706       | -2.395    | 0.017                 | 0.195                      |
| MIF    | chr22:23894167       | 2.287     | 0.022                 | 0.195                      |
| MIF    | chr22:23894177       | 2.323     | 0.020                 | 0.195                      |
| IRX2*  | chr5:2468198         | -2.341    | 0.019                 | 0.195                      |
| TGFBR1 | chr9:99146591        | -2.430    | 0.015                 | 0.195                      |
| ACP1   | chr2:273567          | 2.198     | 0.028                 | 0.224                      |
| INPP1  | chr2:190354502       | -2.145    | 0.032                 | 0.235                      |
| OXTR   | chr3:8762680         | -2.055    | 0.040                 | 0.270                      |
| ANK3   | chr10:60124978       | -1.948    | 0.051                 | 0.283                      |
| BDNF   | chr11:27658429       | -1.984    | 0.047                 | 0.283                      |
| INPP1  | chr2:190354478       | -1.966    | 0.049                 | 0.283                      |

Results with an uncorrected P-value less than 0.05 shown. GRCh38/hg38 used to annotate genomic locations. \*Closest gene if variant is intergenic.

**Supplemental Table 3. Correlation between DNA methylation and severity of most lethal attempt**

| <b>Gene</b> | <b>CpG Genomic Location</b> | <b>Statistic</b> | <b>P-value</b>        | <b>False Discovery Rate (FDR)</b> |
|-------------|-----------------------------|------------------|-----------------------|-----------------------------------|
| CACNA1C     | chr12:2613346               | -3.459           | 5.43x10 <sup>-4</sup> | 0.048                             |
| CACNA1C     | chr12:2613360               | -2.912           | 3.60x10 <sup>-3</sup> | 0.158                             |
| BDNF        | chr11:27658332              | -2.612           | 9.01x10 <sup>-3</sup> | 0.264                             |
| ACP1        | chr2:273531                 | 2.382            | 0.017                 | 0.318                             |
| OXTR        | chr3:8762680                | -2.365           | 0.018                 | 0.318                             |
| IMPA2       | chr18:11994474              | -2.118           | 0.034                 | 0.502                             |
| IMPA2       | chr18:11994457              | -2.021           | 0.043                 | 0.545                             |

Results with an uncorrected P-value less than 0.05 are shown. GRCh38/hg38 used to annotate genomic locations.
